# Supplementary material for: PES Results in the Tropics Are Region-Specific and Not Universal
Source: Research Square preprint supplement (doi:10.21203/rs.3.rs-8149786/v1), 2025-12-15
Supplement: Supplementary file 1 [file 8bebf4caab3607246caf135a.docx]

Table 11: Summary of literature on anthropogenic factors influencing global tropical forest C stock

| Author(s) and Year | Topic | Anthropogenic factor | Result |
| --- | --- | --- | --- |
| Olubusoye & Musa (2020) | Carbon emissions and economic growth in Africa: are they related? | GDP | Africa: - |
| Bosah et al. (2023) | A continental and global assessment of the role of energy consumption, total natural resource rent, and economic growth as determinants of carbon emissions | GDP | Asia: + |
| Raihan & Tuspekova (2022) | Toward a sustainable environment: Nexus between economic growth, renewable energy use, forested area, and carbon emissions in Malaysia. | GDP | Asia: + |
| Begum et al. (2020) | Dynamic impacts of economic growth and forested area on carbon dioxide emissions in Malaysia | GDP | Asia: - |
| Baloch (2020) | Analyzing the relationship between poverty, income inequality, and CO2 emission in Sub-Saharan African countries | Low-income | Africa: - |
| Liu et al. (2019) | Examining the effects of income inequality on CO2 emissions: evidence from non-spatial and spatial perspectives | Low-income | Africa: - |
| Khan et al. (2022) | Impact of poverty and income inequality on the ecological footprint in Asian developing economies: Assessment of Sustainable Development Goals | Low-income | Asia: - |
| Bosah et al. (2023) | A continental and global assessment of the role of energy consumption, total natural resource rent, and economic growth as determinants of carbon emissions | Natural resources rent1 | Asia: - |
| Li et al. (2023) | Examining the role of sustainability and natural resources management in improving environmental quality: Evidence from Asian countries | Natural resources rent1 | Asia: - |
| Danish (2020) | Moving toward sustainable development: The relationship between water productivity, natural resource rent, international trade, and carbon dioxide emissions | Natural resources rent1 | Asia: - |
| Kemigisha et al. (2023) | Payment for environmental services to reduce deforestation: Do the positive effects last? | PES policy | Africa: + |
| Nath et al. (2023) | Payment for Ecosystem Services from agroforestry: case studies and lessons. | PES policy | Africa: + |
| Lliso et al. (2021) | On the role of social equity in payments for ecosystem services in Latin America: A practitioner perspective | PES policy | America: - |
| Bordin et al. (2023) | No relationship between biodiversity and forest carbon sink across the subtropical Brazilian Atlantic Forest | PES policy | America: +  (no significant) |
| Ruggeiro et al. (2019) | Payment for ecosystem services programs in the Brazilian Atlantic Forest: effective but not enough | PES policy | America: +  (no significant) |
| AFoCO (2022) | Training Report: Payments for Ecosystem Services | PES policy | Asia: - |
| Liu et al. (2019) | How much will cash forest encroachment in rainforests cost? A case from valuation to payment for ecosystem services in China | PES policy | Asia: - |
| To & Dressler (2019) | Rethinking ‘Success’: the politics of payment for forest ecosystem services in Vietnam | PES policy | Asia: - |
| This study (2024) | Assessment of anthropogenic factors on global tropical forest carbon sink  Assessment of anthropogenic factors on global tropical forest carbon sink | GDP | Global: +  (no significant)  Africa: - (significant)  America: + (significant)  Asia: - (no significant) |
| GDP |
| GDP |
| GDP |
| Low-income | America: -  (no significant) |
| Forest rent | Global: - (no significant) |
| Forest rent | Africa: - (no significant) |
| Forest rent | America: +  (no significant) |
| Forest rent | Asia: + (no significant) |
| Forest rent * PES | Global: - (significant) |
| Forest rent * PES | Africa: - (no significant) |
| Forest rent * PES | America: - (significant) |
| Forest rent * PES | Asia: + (no significant) |
|  | PES policy | Global: + (significant)  Africa: - (no significant)  America: + (significant)  Asia: - (significant) |
| PES policy |
| PES policy |
| PES policy |

Source: This study.

Note: 1 Natural resources rent included oil, mineral and forest rents. Significant if p < 0.1.

- symbol indicated negative relationship; + symbol indicated positive relationship.
